# Supplementary material
Source: Springer Nature journal article supplement (https://www.springermedizin.de/resource/supplementary/12887_2012_982_MOESM1_ESM.pdf/9476866)

Recruitment of the mothers

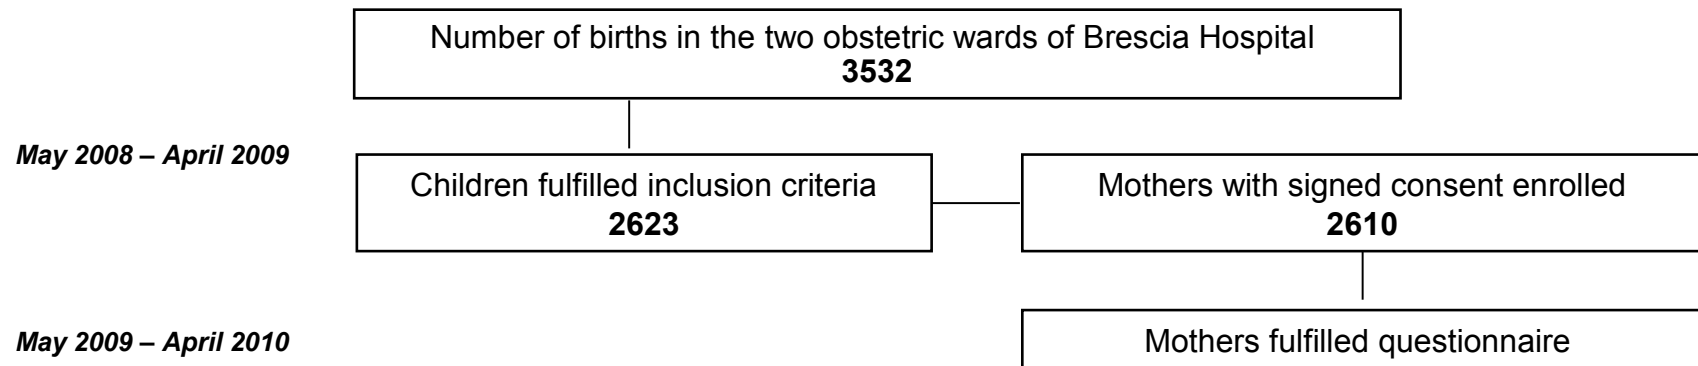

Clinical examination of the children

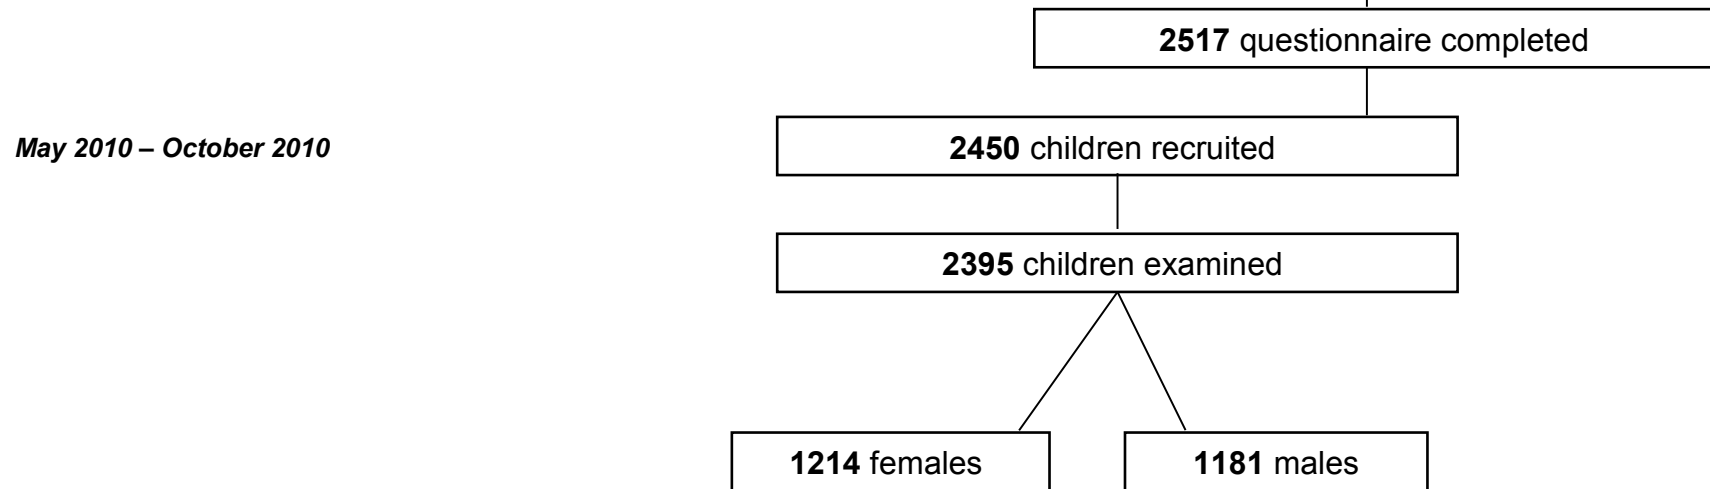

Supplement: MOESM1 [file 9476866]
